# Supplementary material for: Bioaccessibility and Intestinal Transport of Tebuconazole in Table Grape by Using In Vitro Digestion Models
Source: MDPI journal article supplement (doi:10.3390/foods11233926), 2022-12-05
Supplement: s1 [file s1]

**Table S1.** Reagents, pH value, solid-liquid ratio and digestion time of different in vitro simulated digestion methods.

| Simulation method | Simulated digestive fluid | Reagent (The content in 1L water)                                                                                                         | PH value | Solid-Liquid ratio (%) | Digestion time (h) |
|-------------------|---------------------------|-------------------------------------------------------------------------------------------------------------------------------------------|----------|------------------------|--------------------|
| DIN               | Gastric juice             | 1 g Pepsin, 3 g Mucin, 2.9 g NaCl, 0.7 g KCl, 0.27 gKH <sub>2</sub> PO <sub>4</sub>                                                       | 2        | 1:10                   | 2                  |
|                   | Intestinal juice          | 9 g Bile powder, 9 g Pancreatin, 0.3 g Trypsin,0.3 g Urea,0.3 g NaCl, 0.3 g KCl, 0.5 g CaCl <sub>2</sub> , 0.2 g MgCl <sub>2</sub>        | 7.5      | 1:20                   | 6                  |
| IVG               | Gastric juice             | 10 g Pepsin, 8.77 g NaCl                                                                                                                  | 1.8      | 1:10                   | 1                  |
|                   | Intestinal juice          | 3.5 g Bile powder, 0.35 g Trypsin                                                                                                         | 5.5      | 1:20                   | 1                  |
| PBET              | Gastric juice             | 1.25 g Pepsin, 0.5 g NaCl, 0.5 g Sodium citrate, 0.42 mL Lactic acid, 0.5 mL acetic acid                                                  | 2.5      | 1:10                   | 1                  |
|                   | Intestinal juice          | 1.75 g Bile powder, 0.5 g Pancreatin                                                                                                      | 7.5      | 1:20                   | 4                  |
| SBRC              | Gastric juice             | 30.03 g Glycine                                                                                                                           | 1.5      | 1:10                   | 1                  |
|                   | Intestinal juice          | 1.75 g Bile powder, 0.5 g Pancreatin                                                                                                      | 7        | 1:20                   | 4                  |
| SHIME             | Nutrient solution         | 1 g Peptone, 1 gD-(+)-Galactose, 1 g Xylan, 2 g Pectin, 3 g Soluble starch, 4 g Mucin, 0.5 g L-cysteine, 0.4 g Glucose, 3 g Yeast Extract |          | -                      |                    |
|                   | Gastric acid              | 0.089 g of pepsin is dissolved in 1 L of 1 mol/L hydrochloric acid solvent                                                                |          |                        |                    |
|                   | Gastric juice             | Add 125 mL of gastric acid to 1 L of nutrient solution                                                                                    | 2.5      | 1:40                   | 2                  |
|                   | Intestinal juice          | 12.5 g NaHCO <sub>3</sub> , 6 g Bile powder, 0.9 g Pancreatin are added to 1 L nutrient solution                                          | 6.5      | 1:40                   | 2                  |

NaCl: Sodium chloride; KCl: Potassium Chloride; MgCl<sub>2</sub>: Magnesium chloride; CaCl<sub>2</sub>: Calcium chloride; KH<sub>2</sub>PO<sub>4</sub>: Potassium dihydrogen phosphate; HCl: Hydrochloric acid; NaHCO<sub>3</sub>: Sodium bicarbonate.

**Table S2.** Linear range, calibration curves, correlation coefficients ( $R^2$ ) and Limits of quantification (LOQs) of tebuconazole in grapes and simulated digestive gastrointestinal juice.

| Matrix  | Linear range<br>(mg/kg) | Linear equation    | Correlation<br>coefficients( $R^2$ ) | LOQs  | Recovery rate(%) (RSDs) (n=5) |               |               |
|---------|-------------------------|--------------------|--------------------------------------|-------|-------------------------------|---------------|---------------|
|         |                         |                    |                                      |       | 0.02mg/kg                     | 0.2 mg/kg     | 2 mg/kg       |
| Grape   | 0.005-1                 | Y=14938.4X+7140.32 | 0.998706                             | 0.005 | 71.10 (3.04)                  | 78.73 (5.91)  | 72.44 (4.80)  |
| DIN-G   | 0.01-1                  | Y=1054.48X+4193.51 | 0.991032                             | 0.01  | 73.50 (4.19)                  | 104.19 (5.17) | 89.40 (2.61)  |
| DIN-I   | 0.05-1                  | Y=562.945X-62.3157 | 0.999671                             | 0.05  | 105.20 (3.25)                 | 102.01 (3.76) | 94.07 (5.18)  |
| IVG-G   | 0.05-2                  | Y=1382.86X+2253.5  | 0.99967                              | 0.05  | 98.60 (4.99)                  | 100.97 (3.70) | 87.06 (3.58)  |
| IVG-I   | 0.05-2                  | Y=551.282X+7503.98 | 0.998532                             | 0.05  | 77.00 (4.19)                  | 92.73 (11.38) | 88.84 (3.60)  |
| PBET-G  | 0.01-1                  | Y=1006.55X+4667.17 | 0.999074                             | 0.01  | 116.80 (3.35)                 | 103.91 (2.84) | 110.35 (2.79) |
| PBET-I  | 0.005-1                 | Y=672.693X+876.815 | 0.998914                             | 0.005 | 113.80 (5.90)                 | 116.33 (3.88) | 89.29 (1.70)  |
| SBRC-G  | 0.02-1                  | Y=1302.21X+5630.56 | 0.999511                             | 0.02  | 88.70 (5.95)                  | 98.48 (6.91)  | 76.96 (4.86)  |
| SBRC-I  | 0.01-2                  | Y=1303.96X+6157.78 | 0.999033                             | 0.01  | 80.40 (5.71)                  | 114.33 (1.84) | 101.23(2.74)  |
| SHIME-G | 0.05-1                  | Y=1467.75X+1651.27 | 0.999421                             | 0.05  | 115.50 (4.72)                 | 113.13 (1.40) | 108.91 (1.47) |
| SHIME-I | 0.002-2                 | Y=673.679X-604.659 | 0.996138                             | 0.002 | 81.90 (2.18)                  | 104.76 (2.37) | 99.17 (0.79)  |

G: Gastric phase; I: Intestinal phase; RSDs: Relative Standard Deviation.
